# Supplementary material
Source: PubMed Central journal article supplement (PMC5233573)
Supplement: NIHMS833839-supplement-Supporting_Information.pdf [file NIHMS833839-supplement-Supporting_Information.pdf]

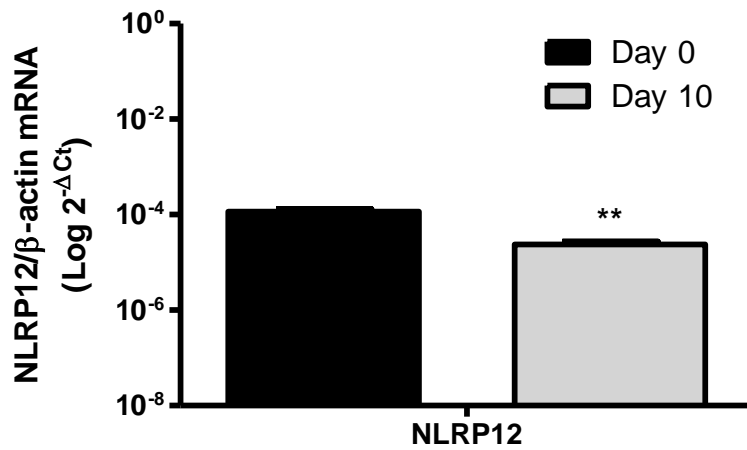

**Figure S1.** Total RNA from C57BL/6 bone marrow cells freshly harvested (day 0) or after differentiation with M-CSF for 10 days (day 10) was isolated. First-strand cDNA synthesis was performed as indicated in material and methods and NLRP12 expression was determined by qPCR analysis. Results were normalized to  $\beta$ -actin. Error bars display mean  $\pm$  SEM. \*\*  $P < 0.005$  in comparison to day 0,  $t$ -test.

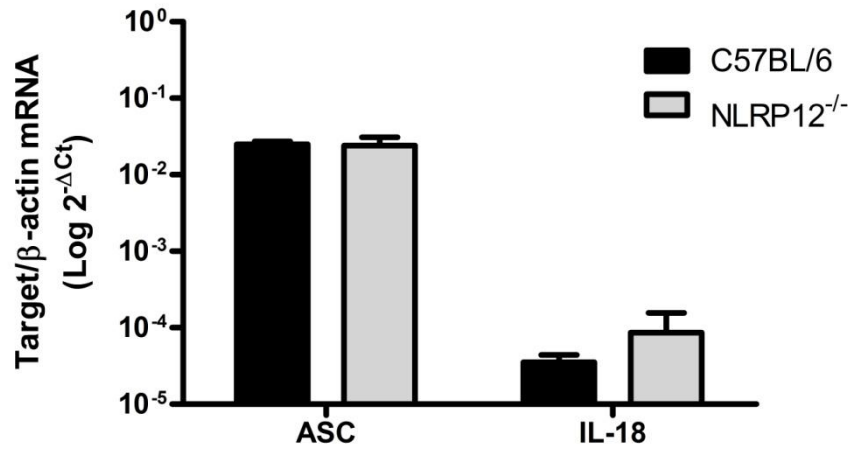

**Figure S2.** BMDMs from C57BL/6 and NLRP12<sup>-/-</sup> mice were infected with *B. abortus* at a MOI of 100:1 for 24 hours. Total RNA was isolated from these cells, first-strand cDNA synthesis was performed as indicated in material and methods and ASC and IL-18 expression were determined by qPCR analysis. Results were normalized to β-actin. Error bars display mean ± SEM.
